# Supplementary material for: Capturing power at higher voltages from arrays of microbial fuel cells without voltage reversal
Source: Royal Society of Chemistry journal article supplement (doi:10.1039/c1ee02451e), 2011-01-01
Supplement: c1ee02451e.pdf [file c1ee02451e.pdf]

Supplementary Information

Capturing Power at Higher Voltages from Arrays of Microbial Fuel Cells  
without Voltage Reversal

Younggy Kim, Marta C. Hatzell, Adam J. Hutchinson, Bruce E. Logan\*

Department of Civil and Environmental Engineering, 212 Sackett Building,  
Penn State University, University Park, PA, 16802, U.S.A.

\*Corresponding author: [blogan@psu.edu](mailto:blogan@psu.edu); 814-863-7908

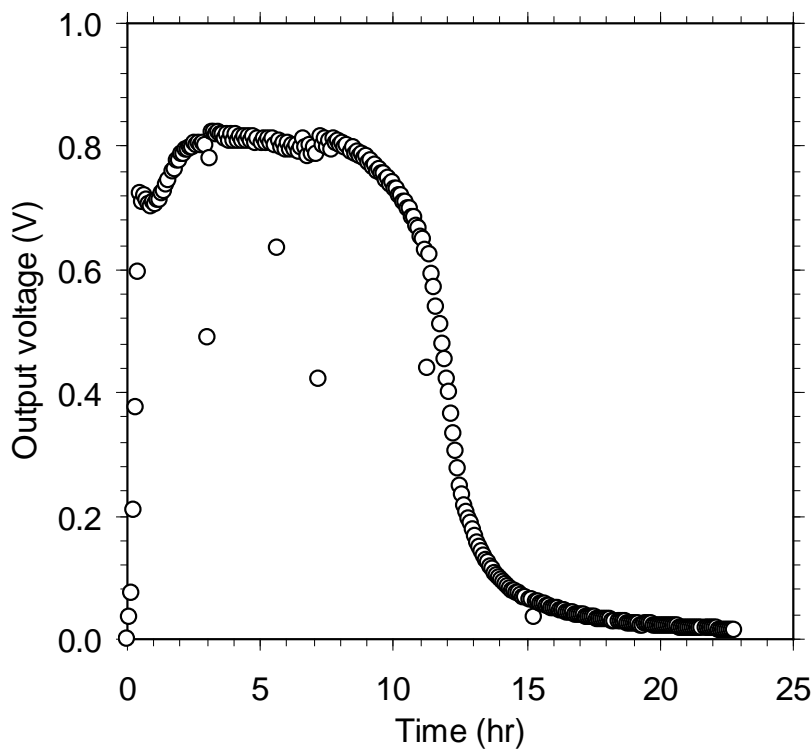

Figure S1. Stable and continuous voltage production from 4 MFCs with a 250-Ω external resistor. The circuit was built with 4 capacitors in each set and the capacitor set alternated the charging and discharging roles every one second.

16

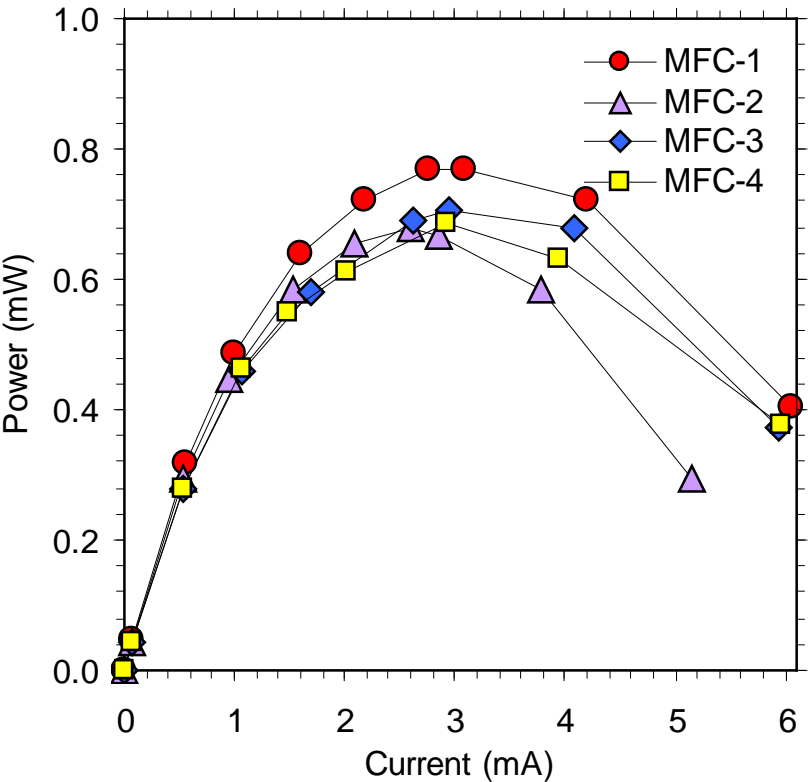

17

18 Figure S2. Power performance of individual MFCs without the circuit.

19
